# Supplementary material
Source: publisher figshare collection journal article supplement (https://acs.figshare.com/ndownloader/files/4563100)
Supplement: Supplementary file 1 [file 4563100]

# SUPPORTING INFORMATION TABLE: Characterization of the Water Content and the State of Water and the Proton

## Conductivity of Nafion 117 and Pore-filling Electrolyte Membranes

| Membrane   | filled<br>polymer | Water content <sup>(a)</sup> [%] |      |       |             | $\lambda^{(b)}$ [H <sub>2</sub> O]/[SO <sub>3</sub> H] |      |       |             | proton<br>conductivity <sup>(c)</sup><br>[S/cm] |
|------------|-------------------|----------------------------------|------|-------|-------------|--------------------------------------------------------|------|-------|-------------|-------------------------------------------------|
|            |                   | total                            | free | bound | unfreezable | total                                                  | free | Bound | unfreezable |                                                 |
| Nafion 117 | -                 | 37.0                             | 5.3  | 17.0  | 14.7        | 22.8                                                   | 3.2  | 10.5  | 9.1         | 0.080                                           |
| PI-SPES-a  | SPES-a            | 16.5                             | 0    | <0.1  | 16.5        | 12.6                                                   | 0    | < 0.1 | 12.6        | 0.001                                           |
| PI-SPES-b  | SPES-b            | 19.2                             | 0    | <0.1  | 19.2        | 9.7                                                    | 0    | < 0.1 | 9.7         | 0.002                                           |
| PI-SPES-c  | SPES-c            | 33.1                             | 0    | 3.0   | 30.1        | 12.1                                                   | 0    | 1.1   | 11.0        | 0.004                                           |
| PI-SPES-d  | SPES-d            | 48.7                             | 0    | 9.9   | 38.8        | 14.6                                                   | 0    | 3.0   | 11.6        | 0.007                                           |
| PI-SPES-e  | SPES-e            | 54.2                             | 0    | 17.3  | 36.9        | 15.4                                                   | 0    | 4.9   | 10.5        | 0.022                                           |
| PI-SPES-f  | SPES-f            | 47.6                             | 0    | 17.7  | 29.9        | 10.5                                                   | 0    | 3.9   | 6.6         | 0.033                                           |
| PI-SPES-g  | SPES-g            | 55.4                             | 0    | 23.5  | 31.9        | 11.8                                                   | 0    | 5.0   | 6.8         | 0.052                                           |

(a) The total water content was calculated from equation 3. The free, bound, and unfreezable water content were calculated from the water content (%) and the result of the DSC measurement. (b) The hydration number  $\lambda$  was calculated from the result of the DSC measurement. (c) 25 °C, fully hydrated condition.
